# Supplementary material
Source: PubMed Central journal article supplement (PMC3388130)
Supplement: 11_222_Rahman.Suppl.pdf [file 11_222_Rahman.Suppl.pdf]

# Prime-Boost Vaccination with rBCG/rAd35 Enhances CD8<sup>+</sup> Cytolytic T Cell Responses in Lesions from *Mycobacterium Tuberculosis*-Infected Primates

Sayma Rahman,<sup>1</sup> Isabelle Magalhaes,<sup>2,3</sup> Jubayer Rahman,<sup>1</sup> Raija K Ahmed,<sup>3</sup> Donata R Sizemore,<sup>4</sup> Charles A Scanga,<sup>4</sup> Frank Weichold,<sup>4</sup> Frank Verreck,<sup>5</sup> Ivanela Kondova,<sup>5</sup> Jerry Sadoff,<sup>4</sup> Rigmor Thorstensson,<sup>3</sup> Mats Spångberg,<sup>3</sup> Mattias Svensson,<sup>1</sup> Jan Andersson,<sup>1,6</sup> Markus Maeurer,<sup>2,3</sup> and Susanna Brighenti<sup>1</sup>

Online address: <http://www.molmed.org>

The Feinstein Institute for Medical Research 

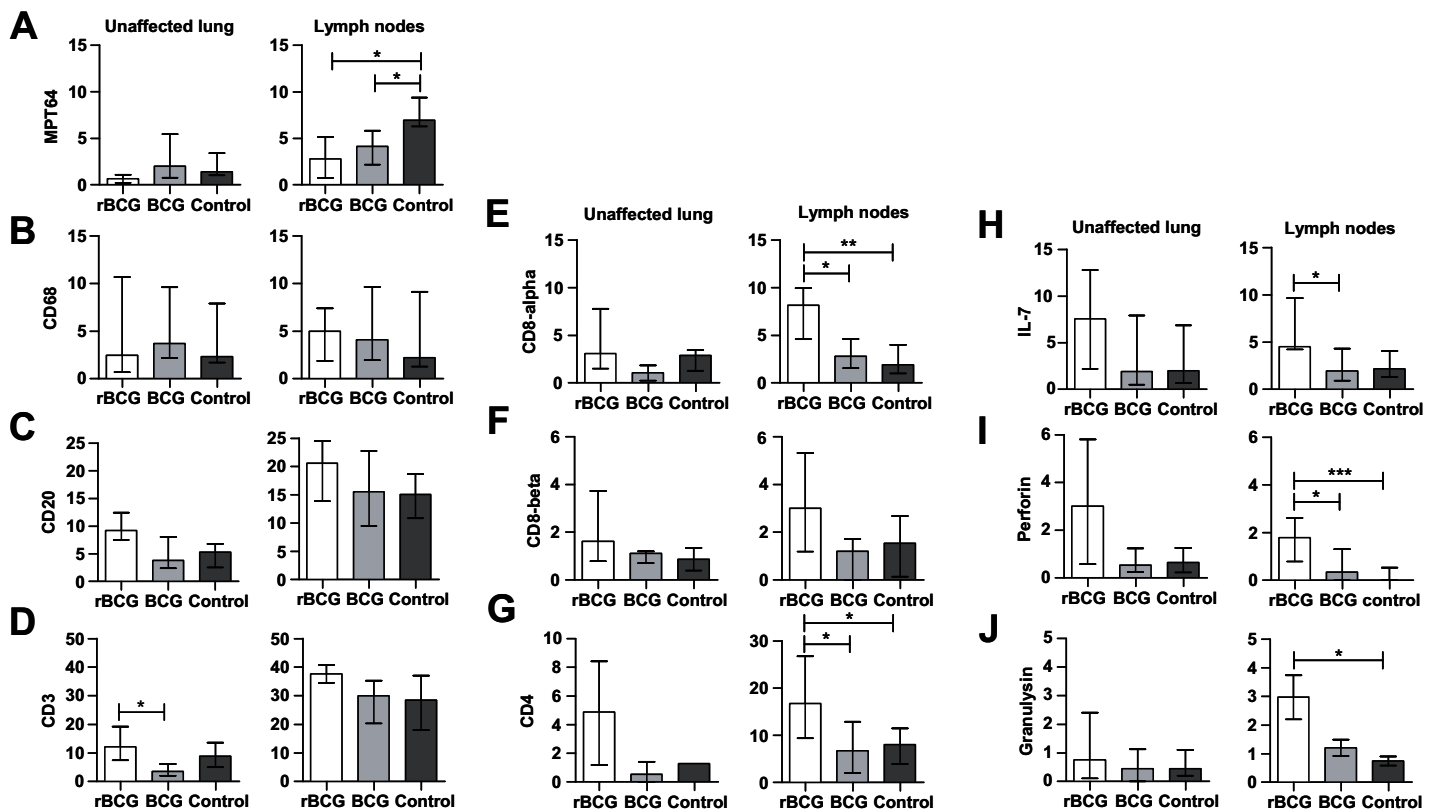

**Supplementary Figure 1.** Immunohistochemical analysis of unaffected lung tissue as well as axillary and hilar lymph nodes (pooled results) obtained from rBCG (rBCG/rAd35) or BCG (BCG/rAd35)-vaccinated and control (unvaccinated) animals after infection with Mtb. Protein expression of (A) MPT64, (B) CD68+ macrophages, (C) CD20+ B cells, (D) CD3+ T cells, (E) CD8 $\alpha$ + T cells, (F) CD8 $\beta$ + T cells, (G) CD4+ T cells, (H) IL-7, (I) perforin and (J) granulysin was assessed using in situ computerized image analysis. Data are presented as % positive area of the total cell area and the median  $\pm$  IQR from n=5-6 animals/group is shown. Statistical significance of differences in protein expression was determined by a non-parametric Kruskal-Wallis test.

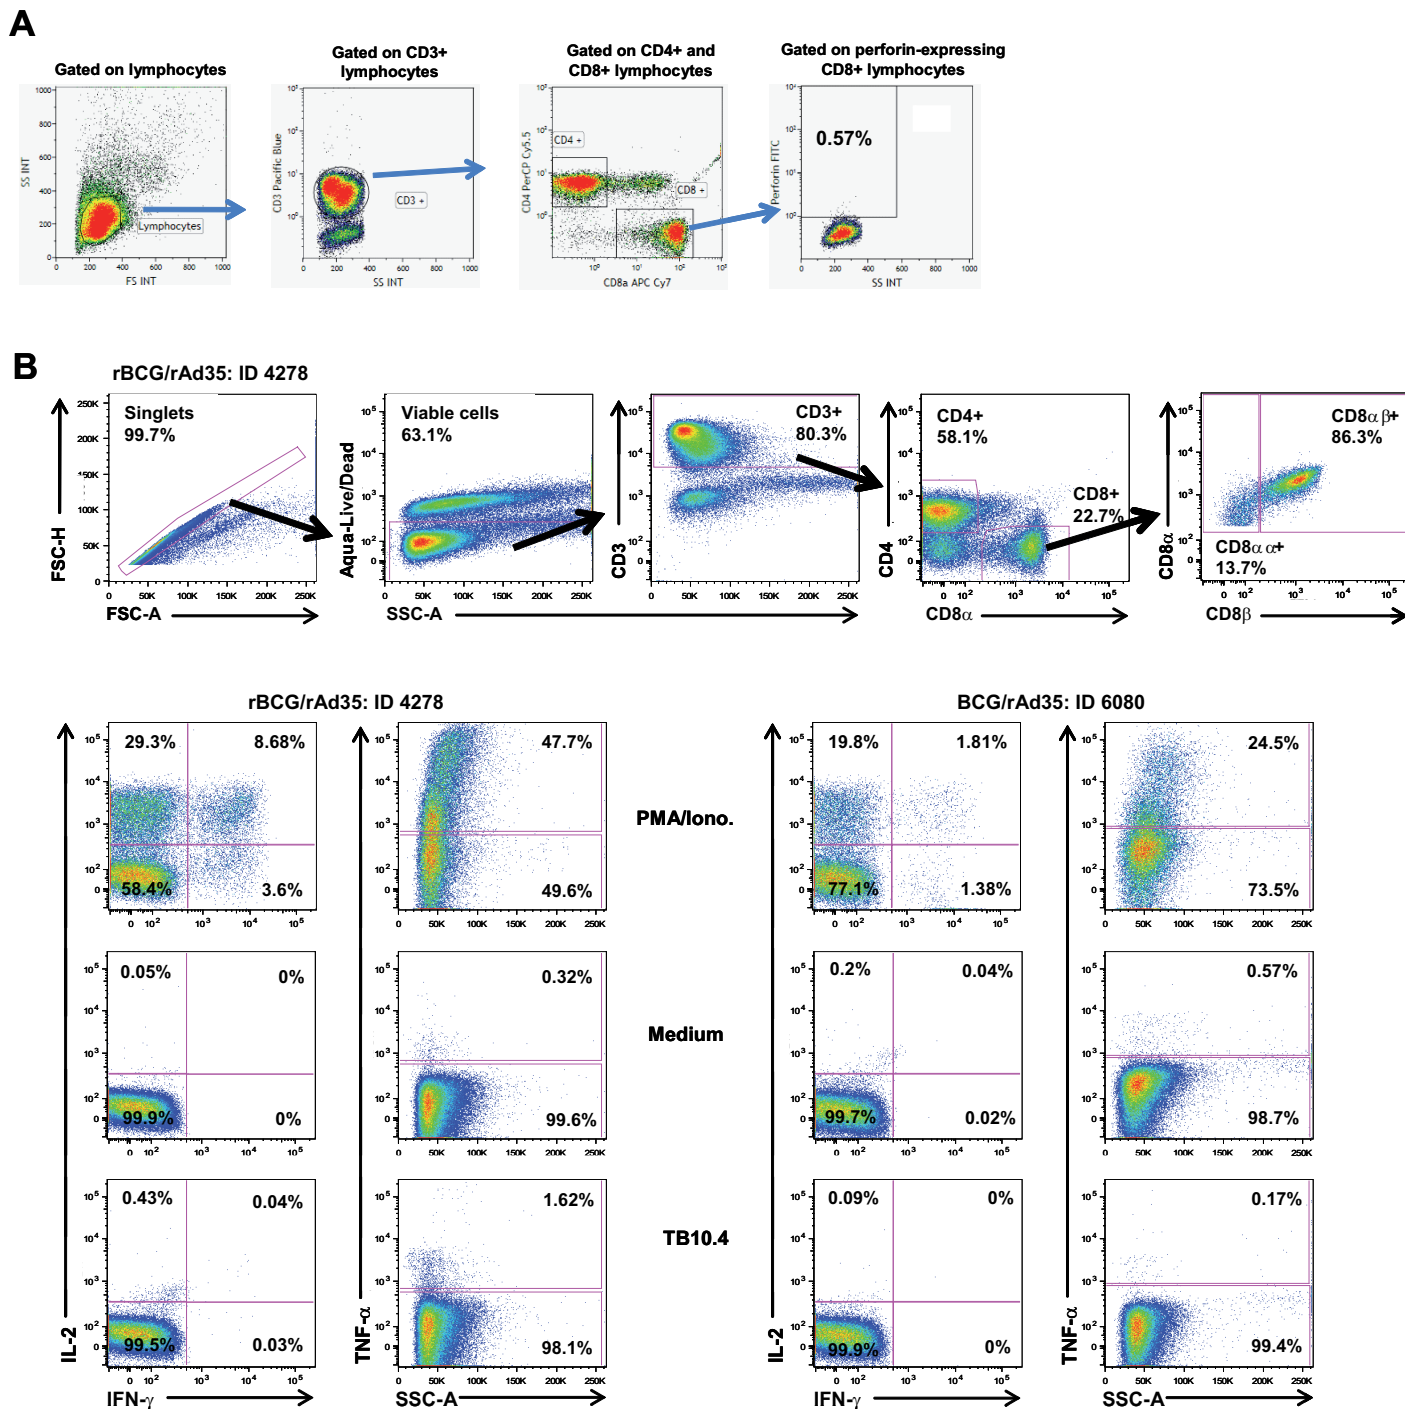

## MATERIAL AND METHODS

### Intracellular Cytokine Staining

Frozen PBMCs from vaccinated NHPs were thawed, rested overnight, and stimulated for 6 hours with peptide pools in RPMI (Gibco, Invitrogen; supplemented with 2 mM L-glutamine, 100 IU/ml penicillin, 10 mg/ml streptomycin, and 10% heat-inactivated fetal bovine serum) in the presence of 10 $\mu$ g/ml BFA (Sigma Aldrich). Cells stimulated with 25ng/ml

phorbol 12-myristate 13-acetate (PMA) and 1 $\mu$ g/ml of ionomycin (Sigma Aldrich) were used as a positive control. PBMCs were stained with surface antibodies including anti-CD3 Pacific Blue (SP34-2), anti-CD4 PerCP-Cy5.5 (L200), anti-CD8 $\alpha$  APC-Cy7 (SK1), and anti-CD8 $\beta$  FITC (2ST8.5H7), in the presence of an Aqua LIVE/DEAD fixable dead cell marker (Invitrogen), for 30 minutes at 4°C. Cells were washed, fixed and permeabilized using the IntraPrep Fix/Perm

Kit (Beckman Coulter) and incubated for 30 minutes at 4°C with antibodies specific for intracellular cytokines including anti-IL-2 PE (MQ1-17H12), anti-interferon (IFN)- $\gamma$  PE-Cy7 (B27), and anti-tumor necrosis factor (TNF)- $\alpha$  APC (MAb11) before flow cytometric analysis (BD FACSCanto flow cytometer; BD Biosciences). Anti-CD8 $\beta$  FITC (2ST8.5H7) was custom-conjugated at Beckman Coulter whereas all other antibodies were obtained from BD Biosciences.

**Supplementary Table 1.** Polyfunctional<sup>a</sup> TB10.4-specific T cells in peripheral blood 15 wks post Mtb challenge<sup>b</sup>.

| Group and animal ID | Stimulation    | Average % of CD3+CD4+ cytokine-producing cells | Average % of CD3+CD8 $\alpha$ $\alpha$ + cytokine-producing cells | Average % of CD3+CD8 $\alpha$ $\beta$ + cytokine-producing cells |
|---------------------|----------------|------------------------------------------------|-------------------------------------------------------------------|------------------------------------------------------------------|
| rBCG/rAd35: ID 4278 | Medium control | 0,23                                           | 0,64                                                              | 0,25                                                             |
|                     | PMA/ionomycin  | 51,76                                          | 42,05                                                             | 44,82                                                            |
|                     | TB10.4         | 0,93                                           | 2,00                                                              | 1,42                                                             |
| BCG/rAd35: ID 6080  | Medium control | 0,89                                           | 1,54                                                              | 0,55                                                             |
|                     | PMA/ionomycin  | 24,56                                          | 78,93                                                             | 29,13                                                            |
|                     | TB10.4         | 0,43                                           | 0,65                                                              | 0,46                                                             |

<sup>a</sup> Polyfunctional T cells simultaneously producing a combination of IL-2, TNF- $\alpha$ , and/or IFN- $\gamma$ .

<sup>b</sup> All stimulations were done in duplicates, and average values of duplicates are presented.
